# Supplementary material
Source: PubMed Central journal article supplement (PMC7217643)

# THE LANCET

## Gastroenterology & Hepatology

### Supplementary appendix

This appendix formed part of the original submission and has been peer reviewed. We post it as supplied by the authors.

Supplement to: Mao R, Qiu Y, He J-S, et al. Manifestations and prognosis of gastrointestinal and liver involvement in patients with COVID-19: a systematic review and meta-analysis. *Lancet Gastroenterol Hepatol* 2020; 5: 667–78.

**This online publication has been corrected. The corrected version first appeared at [thelancet.com/gastrohep](https://www.thelancet.com/gastrohep) on June 15, 2020.**

**Supplementary Table 1. Characteristics of the Included Studies.**

| First author, Year           | Design         | Center | Site                  | No. of pts | Median Age Yrs (IQR)_or Mean $\pm$ SD* | pediatric          | Male N (%) | GI/liver Comorbidities N (%) | Liver Comorbidities N (%) |
|------------------------------|----------------|--------|-----------------------|------------|----------------------------------------|--------------------|------------|------------------------------|---------------------------|
| BE Young ,2020 <sup>31</sup> | Retrospective  | 4      | Singapore             | 18         | 47 (31-73)                             | N                  | 9 (50)     | NA                           |                           |
| J Cai, 2020 <sup>37</sup>    | Retrospective  | 1      | China                 | 10         | 74 (48-108) mo                         | Y                  | 4 (40)     | 0(0)                         |                           |
| C Huang,2020 <sup>15</sup>   | Prospective    | 1      | Wuhan                 | 41         | 49 (41–58)                             | N                  | 30 (73)    | 1 (2)                        | 1 (2)                     |
| C Wu,2020 <sup>16</sup>      | Retrospective  | 1      | Wuhan                 | 201        | 51 (43-60)                             | N                  | 128 (63.7) | 7 (3.5)                      | 7 (3.5)                   |
| D Wang,2020 <sup>33</sup>    | Retrospective, | 1      | Wuhan                 | 138        | 56 (42-68)                             | N                  | 75 (54.3)  | 4 (2.9)                      | 4 (2.9)                   |
| D Chang,2020 <sup>9</sup>    | Retrospective  | 3      | Beijing               | 13         | 34 (34-48)                             | Y(2) <sup>#</sup>  | 10 (77)    | NA                           |                           |
| F Song,2020 <sup>34</sup>    | Retrospective  | 1      | Shanghai              | 51         | 49 (SD 16)*                            | N                  | 25 (49)    | 1 (2)                        | 1 (2)                     |
| J Wu,2020 <sup>38</sup>      | Retrospective  | 3      | Jiangsu               | 80         | 46.1 (SD 15.4)*                        | Y(10) <sup>#</sup> | 39 (49)    | 4 (5)                        | 1 (1.25)                  |
| J Zhang,2020 <sup>48</sup>   | Retrospective  | 1      | Wuhan                 | 140        | 57 (25-87)                             | N                  | 71 (50.7)  | 21 (29.6)                    | 8 (5.7)                   |
| K Liu,2020 <sup>39</sup>     | Retrospective  | 9      | Hubei                 | 137        | 57 (20–83)                             | N                  | 61 (45)    | NA                           |                           |
| M Arentz,2020 <sup>30</sup>  | Retrospective  | 1      | USA                   | 21         | 70 (43-92)                             | N                  | 11 (52)    | 1 (4.8)                      | 1 (4.8)                   |
| M Ng,2020 <sup>41</sup>      | Retrospective  | 2      | Shenzhen<br>Hong Kong | 18         | 56 (37-65)                             | N                  | 13 (62)    | 1 (5)                        | 1 (5)                     |
| N Chen,2020 <sup>32</sup>    | Retrospective, | 1      | Wuhan                 | 99         | 55.5 (SD 13.1)*                        | N                  | 67 (68)    | 11 (11)                      | NA                        |

|                            |               |       |           |      |                    |                    |            |          |          |
|----------------------------|---------------|-------|-----------|------|--------------------|--------------------|------------|----------|----------|
| L Pan,2020 <sup>12</sup>   | Retrospective | 3     | Hubei     | 204  | 54.9 (SD 16.0) *   | N                  | 107(52)    | 3 (1.5)  | 3 (1.5)  |
| S Luo, 2020 <sup>40</sup>  | Retrospective | 1     | Wuhan     | 1141 | 53.8               | N                  | 102 (56)   | NA       |          |
| W Guan,2020 <sup>2</sup>   | Retrospective | 552   | China     | 1099 | 47 (35-58)         | Y(9) <sup>#</sup>  | 637 (58.1) | 23 (2.1) | 23 (2.1) |
| W Yang, 2020 <sup>42</sup> | Retrospective | 3     | Wenzhou   | 149  | 45.11 (SD 13.35) * | N                  | 81(54)     | 8 (5.37) |          |
| X Xu,2020 <sup>45</sup>    | Retrospective | 7     | Zhejiang  | 62   | 41 (32-52)         | Y(2) <sup>#</sup>  | 35 (56)    | 7 (11)   | 7 (11)   |
| X Lu, 2020 <sup>43</sup>   | Retrospective | 1     | Wuhan     | 171  | 6.7yr (1d–15yr)    | Y                  | 104 (60.8) | NA       |          |
| Y Xu,2020 <sup>8</sup>     | Retrospective | 1     | Guangzhou | 10   | 7.5yr (21-164 mo)  | Y                  | 6 (60)     | NA       |          |
| Y Liu,2020 <sup>46</sup>   | Retrospective | 1     | Shenzhen  | 12   | 62.5 (43.5-65)     | Y(1) <sup>#</sup>  | 8 (67)     | 0 (0)    | 0 (0)    |
| Z Wang,2020 <sup>14</sup>  | Retrospective | 1     | Wuhan     | 69   | 42 (35-62)         | N                  | 32 (46)    | 1 (1)    | 1 (1)    |
| H Shi, 2020 <sup>36</sup>  | Retrospective | 2     | Wuhan     | 81   | 49.5 (SD 11.0) *   | N                  | 42 (52)    | 7 (9)    | 7 (9)    |
| X Xu,2020 <sup>44</sup>    | Retrospective | 1     | Guangzhou | 90   | 50 (18–86)         | N                  | 39 (43)    | NA       |          |
| F Zhou,2020 <sup>35</sup>  | Retrospective | 2     | Wuhan     | 191  | 56 (46–67)         | N                  | 119 (62)   | NA       |          |
| Z Zhou 2020 <sup>47</sup>  | Retrospective | 1     | Wuhan     | 254  | 50.6 (36-65)       | N                  | 115 (45.3) | 3 (1.2)  | 3 (1.2)  |
| C Han, 2020 <sup>49</sup>  | Retrospective | 1     | Wuhan     | 206  | 62.5 (27-92)       | N                  | 91 (44.2)  | NA       |          |
| M Du, 2020 <sup>53</sup>   | Retrospective | Multi | Worldwide | 398  | 44.5 (34.5-64.5)   | Y(12) <sup>#</sup> | 227 (58.5) | NA       |          |
| B Cao, 2020 <sup>50</sup>  | Prospective   | 1     | Shanghai  | 199  | 58 (49-68)         | N                  | 120 (60.3) | NA       |          |

|                       |               |   |          |     |                         |   |            |          |          |
|-----------------------|---------------|---|----------|-----|-------------------------|---|------------|----------|----------|
| X Jin <sup>52</sup>   | Retrospective | 1 | Zhejiang | 651 | 46 (SD 14)*             | N | 331 (50.8) | 25 (3.8) | 25 (3.8) |
| P Wu <sup>56</sup>    | Retrospective | 1 | Yichang  | 38  | 68 (53-76)              | N | 25 (65.8)  | NA       |          |
| S Shi <sup>55</sup>   | Retrospective | 1 | Wuhan    | 416 | 64 (21-95) <sup>§</sup> | N | 205 (49.3) | 4 (1.0)  | 4 (1.0)  |
| W Guo <sup>51</sup>   | Retrospective | 1 | Wuhan    | 174 | 59 (49-67)              | N | 76 (43.7)  | 10 (5.7) | 10 (5.7) |
| M Zheng <sup>57</sup> | Retrospective | 1 | Anhui    | 68  | 47 (11-84)              | N | 36 (52)    | NA       |          |
| H Qiu <sup>54</sup>   | Retrospective | 3 | Zhejiang | 36  | 8.3 (SD 3.5)*           | Y | 23 (64)    | NA       |          |

#: The number of paediatric (age less than 18 yrs) included in the study.

\* Mean±SD

<sup>§</sup>Median with Range

**Abbreviations:** NA, not available; Y, yes; N, no; SD, standard deviation; yr, year; d, day; mo, month; Multi, multicenter

**Supplementary Table 2. Quality Ratings of Included Studies According to NIH Quality Assessment Tool**

| First author           | Question <sup>a</sup>  |     |     |    |    |     |     |     |     | Overall Rating |            |
|------------------------|------------------------|-----|-----|----|----|-----|-----|-----|-----|----------------|------------|
|                        | 1                      | 2   | 3   | 4  | 5  | 6   | 7   | 8   | 9   | Reviewer 1     | Reviewer 2 |
|                        | BE Young <sup>31</sup> | Yes | Yes | NR | CD | NA  | Yes | CD  | Yes | Yes            | Fair       |
| J Cai <sup>37</sup>    | Yes                    | Yes | NR  | CD | NA | Yes | CD  | NA  | Yes | Fair           | Fair       |
| C Huang <sup>15</sup>  | Yes                    | Yes | Yes | CD | NA | Yes | CD  | Yes | Yes | Fair           | Fair       |
| C Wu <sup>16</sup>     | Yes                    | Yes | Yes | CD | NA | Yes | CD  | Yes | Yes | Fair           | Fair       |
| D Wang <sup>33</sup>   | Yes                    | Yes | NR  | CD | NA | Yes | CD  | Yes | Yes | Fair           | Fair       |
| D Chang <sup>9</sup>   | Yes                    | Yes | NR  | CD | NA | Yes | CD  | Yes | Yes | Fair           | Fair       |
| F Zhou <sup>35</sup>   | Yes                    | Yes | Yes | CD | NA | Yes | CD  | Yes | Yes | Fair           | Fair       |
| F Song <sup>34</sup>   | Yes                    | Yes | NR  | CD | NA | Yes | CD  | Yes | Yes | Fair           | Fair       |
| H Shi <sup>36</sup>    | Yes                    | Yes | NR  | CD | NA | Yes | CD  | Yes | Yes | Fair           | Fair       |
| J Wu <sup>38</sup>     | Yes                    | Yes | NR  | CD | NA | Yes | CD  | Yes | Yes | Fair           | Fair       |
| J Zhang <sup>48</sup>  | Yes                    | Yes | NR  | CD | NA | Yes | CD  | Yes | Yes | Fair           | Fair       |
| K Liu <sup>39</sup>    | Yes                    | Yes | CD  | CD | NA | Yes | CD  | Yes | Yes | Fair           | Fair       |
| M Arentz <sup>30</sup> | Yes                    | Yes | NR  | CD | NA | Yes | CD  | Yes | Yes | Fair           | Fair       |
| M Ng <sup>41</sup>     | Yes                    | Yes | CD  | CD | NA | Yes | CD  | Yes | Yes | Fair           | Fair       |
| N Chen <sup>32</sup>   | Yes                    | Yes | NR  | CD | NA | Yes | CD  | Yes | Yes | Fair           | Fair       |
| L Pan <sup>12</sup>    | Yes                    | Yes | NR  | CD | NA | Yes | CD  | Yes | Yes | Fair           | Fair       |
| S Luo <sup>40</sup>    | Yes                    | Yes | NR  | CD | NA | Yes | CD  | Yes | Yes | Fair           | Fair       |
| W Guan <sup>2</sup>    | Yes                    | Yes | Yes | CD | NA | Yes | CD  | Yes | Yes | Fair           | Fair       |
| W Yang <sup>42</sup>   | Yes                    | Yes | Yes | CD | NA | Yes | CD  | Yes | Yes | Fair           | Fair       |
| X Xu <sup>44</sup>     | Yes                    | Yes | NR  | CD | NA | Yes | CD  | Yes | Yes | Fair           | Fair       |
| X Xu <sup>45</sup>     | Yes                    | Yes | NR  | CD | NA | Yes | CD  | Yes | Yes | Fair           | Fair       |
| X Lu <sup>43</sup>     | Yes                    | Yes | NR  | CD | NA | Yes | CD  | Yes | Yes | Fair           | Fair       |
| Y Xu <sup>8</sup>      | Yes                    | Yes | CD  | CD | NA | Yes | CD  | NA  | Yes | Fair           | Fair       |
| Y Liu <sup>46</sup>    | Yes                    | Yes | CD  | CD | NA | Yes | CD  | Yes | Yes | Fair           | Fair       |
| Z Wang <sup>14</sup>   | Yes                    | Yes | NR  | CD | NA | Yes | CD  | Yes | Yes | Fair           | Fair       |
| Z Zhou <sup>47</sup>   | Yes                    | Yes | NR  | CD | NA | Yes | CD  | NA  | Yes | Fair           | Fair       |
| C Han <sup>49</sup>    | Yes                    | Yes | Yes | CD | NA | Yes | CD  | Yes | Yes | Fair           | Fair       |
| M Du <sup>53</sup>     | Yes                    | Yes | CD  | CD | NA | Yes | CD  | Yes | Yes | Fair           | Fair       |
| B Cao <sup>50</sup>    | Yes                    | Yes | Yes | CD | NA | Yes | CD  | Yes | Yes | Fair           | Fair       |
| X Jin <sup>52</sup>    | Yes                    | Yes | NR  | CD | NA | Yes | CD  | Yes | Yes | Fair           | Fair       |
| P Wu <sup>56</sup>     | Yes                    | Yes | NR  | CD | NA | Yes | CD  | Yes | Yes | Fair           | Fair       |
| S Shi <sup>55</sup>    | Yes                    | Yes | Yes | CD | NA | Yes | CD  | Yes | Yes | Fair           | Fair       |
| W Guo <sup>51</sup>    | Yes                    | Yes | Yes | CD | NA | Yes | CD  | Yes | Yes | Fair           | Fair       |
| M Zheng <sup>57</sup>  | Yes                    | Yes | NR  | CD | NA | Yes | CD  | NA  | Yes | Fair           | Fair       |
| H Qiu <sup>54</sup>    | Yes                    | Yes | Yes | CD | NA | Yes | CD  | NA  | Yes | Fair           | Fair       |

Note—NIH = National Institutes of Health, NR = not reported, CD = cannot determine, NA = not applicable.

<sup>a</sup>The NIH Quality Assessment Tool for Case Series Studies [12] poses nine questions:

1 = Was the study question or objective clearly stated?,

2 = Was the study population clearly and fully described, including a case definition?,

3 = Were the cases consecutive?,

4 = Were the subjects comparable?,

5 = Was the intervention clearly described?,

6 = Were the outcome measures clearly defined, valid, reliable, and implemented consistently across all study participants?,

7 = Was the length of follow-up adequate?,

8 = Were the statistical methods well-described?,

9 = Were the results well-described?

(Source: National Heart, Lung, and Blood Institute; National Institutes of Health; U.S. Department of Health and Human Services)

**Supplementary Table 3. Summary of SARS-Cov-2 virus detection in stool or rectal swab in patients with COVID-19**

| First author<br>[ref],Year   | Design        | Site      | No. of pts             | Median Age, yrs<br>(Range) | M:F   | Nausea /<br>Vomiting | Abdominal<br>pain | Diarrhoea | Respiratory<br>symptoms | Timing of first<br>stool/rectal<br>swab*, days | Positive /<br>Tested<br>cases of<br>stool or<br>rectal<br>swab | Duration<br>of virus<br>shedding<br>in stool,<br>days (SD) |
|------------------------------|---------------|-----------|------------------------|----------------------------|-------|----------------------|-------------------|-----------|-------------------------|------------------------------------------------|----------------------------------------------------------------|------------------------------------------------------------|
| JF Chan,2020 <sup>23</sup>   | Retrospective | China     | 6(familial cluster)    | 50 (10-66)                 | 3:3   | 0                    | 0                 | 2         | 5                       | NA                                             | 0/4                                                            | NA                                                         |
| J Cai,2020 <sup>37</sup>     | Retrospective | China     | 10(paediatric)         | 78 (3-131) mo              | 4:4   | 0                    | 0                 | 0         | Y                       | 3-13 d                                         | 5/6*                                                           | 18-30                                                      |
| BE Young,2020 <sup>31</sup>  | Retrospective | Singapore | 18                     | 47 (31-73)                 | 9:9   | N                    | N                 | 3         | N                       | 5-11 d                                         | 4/8                                                            | NA                                                         |
| I Ghina,2020 <sup>60</sup>   | Case report   | USA       | 2(couple) <sup>#</sup> | 60                         | 1:1   | 2                    | 1                 | N         | 2                       | 9-16 d                                         | 1/2                                                            | 14                                                         |
|                              |               |           | Wife                   |                            |       | Y                    | Y                 | N         | Y                       | 9 d                                            | “+”                                                            | 14                                                         |
| T Hosoda,2020 <sup>59</sup>  | Case report   | Japan     | 1                      | 81                         | M     | N                    | Y                 | Y         | N                       | 5 d                                            | “+”                                                            | 15                                                         |
| MLHolshue,2020 <sup>5</sup>  | Case report   | USA       | 1                      | 35                         | M     | Y                    | N                 | Y         | Y                       | 7 d                                            | “+”                                                            | 4                                                          |
| Y Xu,2020 <sup>8</sup>       | Retrospective | China     | 10(paediatric)         | 79.5 (2-188) mo            | 6:4   | 0                    | 0                 | 2         | 9                       | -1~+1 d                                        | 8/10)                                                          | 21                                                         |
| Y Wu,2020 <sup>61</sup>      | Cohort        | China     | 41                     | 41.3 (3.1) <sup>†</sup>    | 17:24 | 11 <sup>**</sup>     |                   |           | Y                       | 2-15 d                                         | 41/74                                                          | 27.9 (10.7)                                                |
| C Han,2020 <sup>49</sup>     | Retrospective | Wuhan     | 22                     | 39.5 (6-71)                | 9:13  | 15 <sup>§</sup>      |                   |           | 17                      | NA                                             | 12/22                                                          | NA                                                         |
| ACarvalho,2020 <sup>62</sup> | Retrospective | USA       | 1                      | 71                         | F     | Y                    | Y                 | Y%        | Y                       | 9 d                                            | “+”                                                            | NA                                                         |
| C Chen, 2020 <sup>63</sup>   | Retrospective | Wuhan     | 22                     | 36.5 (2-64)                | 14:8  | NA                   | NA                | NA        | 22                      | 9.6 d (1 d-25 d)                               | 13/19                                                          | 13.5 (5.0)                                                 |

\*From symptoms onset, #The husband tested negative for stool swab, \*\*Diarrhea/Vomit/abdominal pain, †:Mean (SD)

**Abbreviations:** NA, not available; Y, yes; N, no; SD, standard deviation; yr, year; d, day; mo, month.

**Supplementary Table 4. Summary of GI symptoms and abnormal liver function in patients with Covid-19**

| First author           | No. of pts | Liver Function | Mean $\pm$ SD or median (IQR) | Abnormal Liver Function* N(%) | GI Symptoms        | N(%)        |
|------------------------|------------|----------------|-------------------------------|-------------------------------|--------------------|-------------|
| BE Young <sup>31</sup> | 18         |                |                               |                               | Diarrhoea          | 3 (17)      |
| J Cai <sup>37</sup>    | 10         | ALT            | 8-100                         | 1 (10)                        |                    |             |
|                        |            | AST            | 20-142                        | 2 (20)                        |                    |             |
| C Huang <sup>15</sup>  | 41         | ALB            | 31 (29-36)                    |                               | Diarrhoea          | 1/38 (3)    |
|                        |            | ALT            | 32 (21-50)                    |                               |                    |             |
|                        |            | AST            | 34 (26-48)                    | 15 (37)                       |                    |             |
|                        |            | TB             | 12 (10-14)                    |                               |                    |             |
| C Wu <sup>16</sup>     | 198        | TB             | 11 (9-15)                     | 10 (5)                        |                    |             |
|                        |            | AST            | 33 (26-45)                    | 59 (30)                       |                    |             |
|                        |            | ALT            | 31 (20-47)                    | 43 (22)                       |                    |             |
| D Wang <sup>33</sup>   | 138        |                |                               | NA                            | Loss of appetite   | 55 (40)     |
|                        |            |                |                               |                               | Diarrhoea          | 14 (10)     |
|                        |            |                |                               |                               | Nausea             | 14 (10)     |
|                        |            |                |                               |                               | Vomiting           | 5 (4)       |
|                        |            |                |                               |                               | Abdominal pain     | 3 (2)       |
| D Chang <sup>9</sup>   | 13         |                |                               | NA                            | Diarrhoea          | 1 (8)       |
| F Zhou <sup>35</sup>   | 191        | ALB            | 32 (29-36)                    | NA                            | Diarrhoea          | 9 (5)       |
|                        |            | ALT            | 30 (17-46)                    | 59/189 (31)                   | Nausea or vomiting | 7 (4)       |
| F Song <sup>34</sup>   | 51         |                |                               |                               | Loss of appetite   | 9 (18)      |
|                        |            |                |                               |                               | Diarrhoea          | 5 (10)      |
|                        |            |                |                               |                               | Vomiting           | 3 (6)       |
| H Shi <sup>36</sup>    | 81         | ALT            | 46 (30)                       |                               | Loss of appetite   | 1 (1)       |
|                        |            | AST            | 41 (18)                       | 43 (53)                       | Vomiting           | 4 (5)       |
|                        |            | TB             | 12 (4)                        |                               | Diarrhoea          | 3 (4)       |
|                        |            | ALB            | 33 (8)                        |                               |                    |             |
| J Wu <sup>38</sup>     | 80         | TB             | 7 (5-12)                      | 1 (1)                         | Nausea             | 1 (1)       |
|                        |            | AST            | 30 (19-39)                    | 3 (4)                         | Diarrhoea          | 1 (1)       |
|                        |            | ALT            | 24 (12-38)                    | 3 (4)                         |                    |             |
| J Zhang <sup>48</sup>  | 140        |                |                               | NA                            | GI symptoms        | 55/139 (40) |
|                        |            |                |                               |                               | Nausea             | 24/139 (17) |
|                        |            |                |                               |                               | Diarrhoea          | 18/139 (13) |
|                        |            |                |                               |                               | Loss of appetite   | 17/139 (12) |
|                        |            |                |                               |                               | Abdominal pain     | 8/139 (6)   |
|                        |            |                |                               |                               | Belching           | 7/139 (5)   |
|                        |            |                |                               |                               | Emesis             | 7/139 (5)   |
| K Liu <sup>39</sup>    | 137        |                |                               | NA                            | Diarrhoea          | 11 (8)      |
| M Arentz <sup>30</sup> | 21         | ALT            | 108 (11-1414)                 | NA                            |                    |             |



|                      |      |     |               |              |                                   |             |
|----------------------|------|-----|---------------|--------------|-----------------------------------|-------------|
|                      |      | AST | 273 (14-4432) |              |                                   |             |
|                      |      | TB  | 0.6 (0.2-1.1) |              |                                   |             |
| M Ng <sup>41</sup>   | 18   | ALB | 42 (39-46)    | NA           | Diarrhoea                         | 2 (10)      |
|                      |      | TB  | 7 (6-9)       |              |                                   |             |
|                      |      | ALT | 23 (16-34)    |              |                                   |             |
|                      |      | AST | 26 (20-35)    |              |                                   |             |
| N Chen <sup>32</sup> | 99   | TB  | 15 (7)        | 18 (18)      | Nausea                            | 2           |
|                      |      | AST | 34 (26-48)    | 35 (35)      |                                   |             |
|                      |      | ALT | 39 (22-53)    | 28 (28)      |                                   |             |
| L Pan <sup>12</sup>  | 103  | TB  | 14±10         |              | Loss of appetite                  | 81 (79)     |
|                      |      | AST | 31±26         |              | Diarrhoea                         | 35 (34)     |
|                      |      | ALT | 36±36         |              | Vomiting                          | 4 (4)       |
|                      |      |     |               |              | Abdominal pain                    | 2 (2)       |
| S Luo <sup>40</sup>  | 1141 | AST | 66±13         | NA           | Nausea                            | 134 (73)    |
|                      |      | ALT | 66±13         |              | Vomiting                          | 119 (65)    |
|                      |      |     |               |              | Abdominal pain                    | 45 (25)     |
|                      |      |     |               |              | Diarrhoea                         | 68 (37)     |
|                      |      |     |               |              | Loss of appetite                  | 180 (98)    |
|                      |      |     |               |              | Both nausea and vomiting          | 37 (20)     |
|                      |      |     |               |              | Both abdominal pain and diarrhoea | 16 (9)      |
|                      |      |     |               |              | All symptoms                      | 12 (7)      |
| W Guan <sup>2</sup>  | 1099 | TB  |               | 76/722 (11)  | Nausea or vomiting                | 55/1099 (5) |
|                      |      | ALT |               | 158/741 (21) | Diarrhoea                         | 41/1099 (4) |
|                      |      | AST |               | 168/757 (22) |                                   |             |
| W Yang <sup>42</sup> | 149  | ALB | 42±6          | 9 (6)        |                                   |             |
|                      |      | TB  | 10±6          | 4 (3)        |                                   |             |
|                      |      | ALT | 20±21         | 18 (12)      |                                   |             |
|                      |      | AST | 23±16         | 27 (18)      |                                   |             |
| X Xu <sup>44</sup>   | 90   |     |               | NA           | Diarrhoea                         | 5 (6)       |
|                      |      |     |               |              | Nausea                            | 5 (6)       |
|                      |      |     |               |              | Vomiting                          | 2 (2)       |
| X Xu <sup>45</sup>   | 62   | AST | 26 (20-32)    |              | Diarrhoea                         | 3 (8)       |
|                      |      | ALT | 22 (14-34)    | 10 (16)      |                                   |             |
| X Lu <sup>28</sup>   | 171  |     |               | NA           | Diarrhoea                         | 15 (9)      |
|                      |      |     |               |              | Vomiting                          | 11 (6)      |
| Y Xu <sup>8</sup>    | 10   | ALB | 45±3          | NA           | Diarrhoea                         | 3 (30)      |
|                      |      | ALT | 34±52         | 1/9 (11)     |                                   |             |
|                      |      | AST | 40±36         | 2/9 (22)     |                                   |             |
|                      |      | TB  | 5±2           | 0 (0)        |                                   |             |

|                      |             |            |            |            |                                      |         |
|----------------------|-------------|------------|------------|------------|--------------------------------------|---------|
| Y Liu <sup>46</sup>  | 12          | AST        | 40±22      | 3 (25)     | Diarrhoea                            | 2       |
|                      |             | ALT        | 32±12      | 2 (17)     | Vomiting                             | 2       |
|                      |             | TB         | 9±2        |            |                                      |         |
|                      |             | ALB        | 41±5       |            |                                      |         |
| Z Wang <sup>14</sup> | 69          | ALT        | 25 (17-40) | 23/69 (33) | Diarrhoea                            | 10 (14) |
|                      |             | AST        | 28 (22-42) | 19/69 (28) | Loss of appetite                     | 7 (10)  |
| Z Zhou <sup>47</sup> | 254         |            |            | NA         | Vomiting                             | 3 (4)   |
|                      |             |            |            |            | GI symptoms                          | 66 (26) |
|                      |             |            |            |            | Abdominal pain                       | 3 (1)   |
|                      |             |            |            |            | Vomiting                             | 15 (6)  |
| C Han <sup>49</sup>  | 206         |            |            | NA         | Diarrhoea                            | 46 (18) |
|                      |             |            |            |            | Nausea                               | 21 (8)  |
|                      |             |            |            |            | Poor appetite                        | 70 (34) |
|                      |             |            |            |            | Low appetite                         | 32 (16) |
| M Du <sup>53</sup>   | 398         |            |            | NA         | Vomiting                             | 24 (12) |
|                      |             |            |            |            | Diarrhoea                            | 67 (33) |
|                      |             |            |            |            | Abdominal pain                       | 9 (4)   |
|                      |             |            |            |            | Digestive Symptoms <sup>§</sup>      | 14 (4)  |
| B Cao <sup>50</sup>  | 199         | AST        | 34 (26-45) | 40 (21)    |                                      |         |
|                      |             | ALT        | 33 (22-55) | 80 (41)    |                                      |         |
| X Jin <sup>52</sup>  | 651         |            |            |            |                                      |         |
|                      | 74(GI)      | ALB        | 40 (36-43) |            | Diarrhoea                            | 53 (8)  |
|                      |             | ALT        | 25 (16-39) |            | Vomiting                             | 11 (2)  |
|                      |             | AST        | 29 (21-39) |            | Nausea                               | 10 (2)  |
|                      |             | TB         | 10 (7-14)  |            | Diarrhoea,<br>vomiting and<br>nausea | 3 (1)   |
|                      |             |            |            |            | Nausea and<br>vomiting               | 4 (1)   |
|                      | 577(Non GI) | ALB        | 42 (39-44) |            |                                      |         |
|                      | ALT         | 22 (15-33) |            |            |                                      |         |
|                      | AST         | 24 (19-32) |            |            |                                      |         |
|                      | TB          | 10 (7-13)  |            |            |                                      |         |
| P Wu <sup>56</sup>   | 38          | ALT        | 31 (28)    |            |                                      |         |
|                      |             | AST        | 36 (27)    |            |                                      |         |
| S Shi <sup>55</sup>  | 416         | ALT        | 28 (18-46) |            | Diarrhoea                            | 16 (4)  |
|                      |             | AST        | 30 (22-43) |            |                                      |         |
|                      |             | ALB        | 36 (32-38) |            |                                      |         |
| W Guo <sup>51</sup>  | 174         | ALT        | 26 (21-37) |            | Nausea and<br>Vomiting               | 17 (10) |
|                      |             |            |            |            | Diarrhoea                            | 21 (12) |

|                       |    |     |            |       |                          |       |
|-----------------------|----|-----|------------|-------|--------------------------|-------|
| H Qiu <sup>54</sup>   | 36 | ALT |            | 2 (6) | Vomiting or<br>Diarrhoea | 2 (6) |
|                       |    | AST |            | 3 (8) |                          |       |
| M Zheng <sup>57</sup> | 68 | ALT | 30 (7-167) |       | Diarrhoea                | 3 (4) |
|                       |    | AST | 24 (10-89) |       |                          |       |
|                       |    | TB  | 15 (5-48)  |       |                          |       |
|                       |    | ALB | 38 (10-47) |       |                          |       |

\*: Abnormal liver function was defined as ALT>40U/L, AST>40U/L, TBIL>17.1µmol/L or ALB<30g/L.

<sup>§</sup>: Digestive symptoms include diarrhoea, nausea, vomiting, and loss of appetite.

**Abbreviations:** GI, gastrointestinal symptoms; ALT, Alanine aminotransferase, AST, Aspartate aminotransferase, TB, total bilirubin; CI, confidence intervals; ALB, albumin; NA, not applicable.

**Supplementary Table 5. Subgroup analysis of GI and Liver manifestations in COVID-19 (Hubei vs outside Hubei; adult vs paediatric)**

| Factors                          | Subgroup      | Study(n) | Rates(%) | 95%CI |       | F(%) | P*       |
|----------------------------------|---------------|----------|----------|-------|-------|------|----------|
|                                  |               |          |          | upper | lower |      |          |
| <b>Comorbidity</b>               |               |          |          |       |       |      |          |
| <i>GI comorbidity</i>            | Hubei         | 11       | 4        | 2     | 7     | 81   | 0.943    |
|                                  | outside Hubei | 10       | 4        | 3     | 6     | 49   |          |
| <i>Liver comorbidity</i>         | Hubei         | 9        | 3        | 2     | 5     | 64   | 0.767    |
|                                  | outside Hubei | 8        | 3        | 2     | 6     | 57   |          |
| <b>GI symptoms</b>               |               |          |          |       |       |      |          |
| a) <i>Diarrhea</i>               | Adult         | 19       | 11       | 7     | 15    | 91   | < 0.0001 |
|                                  | Paediatric    | 2        | 10       | 6     | 15    | 0    |          |
|                                  | Mixed#        | 5        | 4        | 3     | 5     | 0    |          |
|                                  | Hubei         | 13       | 11       | 7     | 18    | 94   | 0.132    |
|                                  | outside Hubei | 13       | 7        | 5     | 10    | 66   |          |
|                                  | Adult         | 14       | 7        | 5     | 11    | 89   | 0.1862   |
| Paediatric                       | 1             | 6        | 4        | 11    | NA    |      |          |
| Mixed#                           | 3             | 5        | 4        | 6     | 0     |      |          |
| b) <i>Nausea and/or Vomiting</i> | Hubei         | 12       | 8        | 5     | 11    | 88   | 0.045    |
|                                  | outside Hubei | 6        | 4        | 3     | 7     | 50   |          |
| c) <i>Loss of appetite</i>       | Hubei         | 7        | 22       | 8     | 48    | 99   | 0.708    |
|                                  | outside Hubei | 1        | 18       | 9     | 31    | NA   |          |
| <b>Liver function injury</b>     |               |          |          |       |       |      |          |
| a) <i>Elevated ALT</i>           | Adult         | 7        | 24       | 17    | 33    | 88   | 0.0171   |
|                                  | Paediatric    | 3        | 7        | 3     | 18    | 0    |          |
|                                  | Mixed#        | 4        | 13       | 7     | 24    | 76   |          |
|                                  | Hubei         | 4        | 25       | 17    | 35    | 90   | 0.069    |
|                                  | outside Hubei | 10       | 15       | 9     | 23    | 81   |          |
|                                  | Adult         | 8        | 27       | 19    | 36    | 89   | 0.0089   |
| Paediatric                       | 3             | 13       | 6        | 24    | 0     |      |          |
| Mixed#                           | 3             | 10       | 5        | 19    | 73    |      |          |
| b) <i>Elevated AST</i>           | Hubei         | 5        | 30       | 18    | 46    | 92   | 0.053    |
|                                  | outside Hubei | 9        | 16       | 11    | 24    | 85   |          |
| c) <i>Elevated TB</i>            | Hubei         | 1        | 18       | 12    | 27    | NA   | 0.0014   |
|                                  | outside Hubei | 4        | 4        | 2     | 9     | 43   |          |

\*comparison between Hubei and Outside Hubei, and comparison between adult and paediatric cohorts

#Mixed: Studies included analysis consisted of both adults and paediatric patients.

**Abbreviations:** GI, gastrointestinal; ALT, Alanine aminotransferase, AST, Aspartate aminotransferase, TB, total bilirubin; CI ,confidence intervals; ALB, albumin; NA, not available.

## **Supplementary Figure Legends**

**Supplementary Figure 1.** Pooled estimate of digestive system comorbidities rate in patients with COVID-19.

**Supplementary Figure 2.** The pooled estimate of GI symptoms as initial presenting symptoms in patients with COVID-19.

**Supplementary Figure 3.** Pooled estimate of GI symptoms rate in patients with COVID-19.

**Supplementary Figure 4.** Estimated incidence of liver injury in patients with COVID-19.

**Supplementary Figure 5.** Estimated incidence of severe case stratified by digestive/liver-related comorbidities

**Supplementary Figure 6.** The pooled estimate of complications in patients with COVID-19 stratified by GI system involvement

**Supplementary Figure 7.** Forrest plot of meta-analysis of standardized mean differences (SMD) of liver chemistry according to patients' disease severity (severe vs. non-severe).

**Supplementary Figure 8.** Begg's funnel plot for publication bias for incidence of digestive symptoms. Studies (circles) within the projected 95% CI (diagonal lines) should have complementary areas on the opposite side of the dashed line (estimated risk ratio). Gaps in the funnel patterns indicate possible areas of publication bias.

**Supplementary Figure 1.** Pooled estimate of digestive system comorbidities rate in patients with COVID-19.

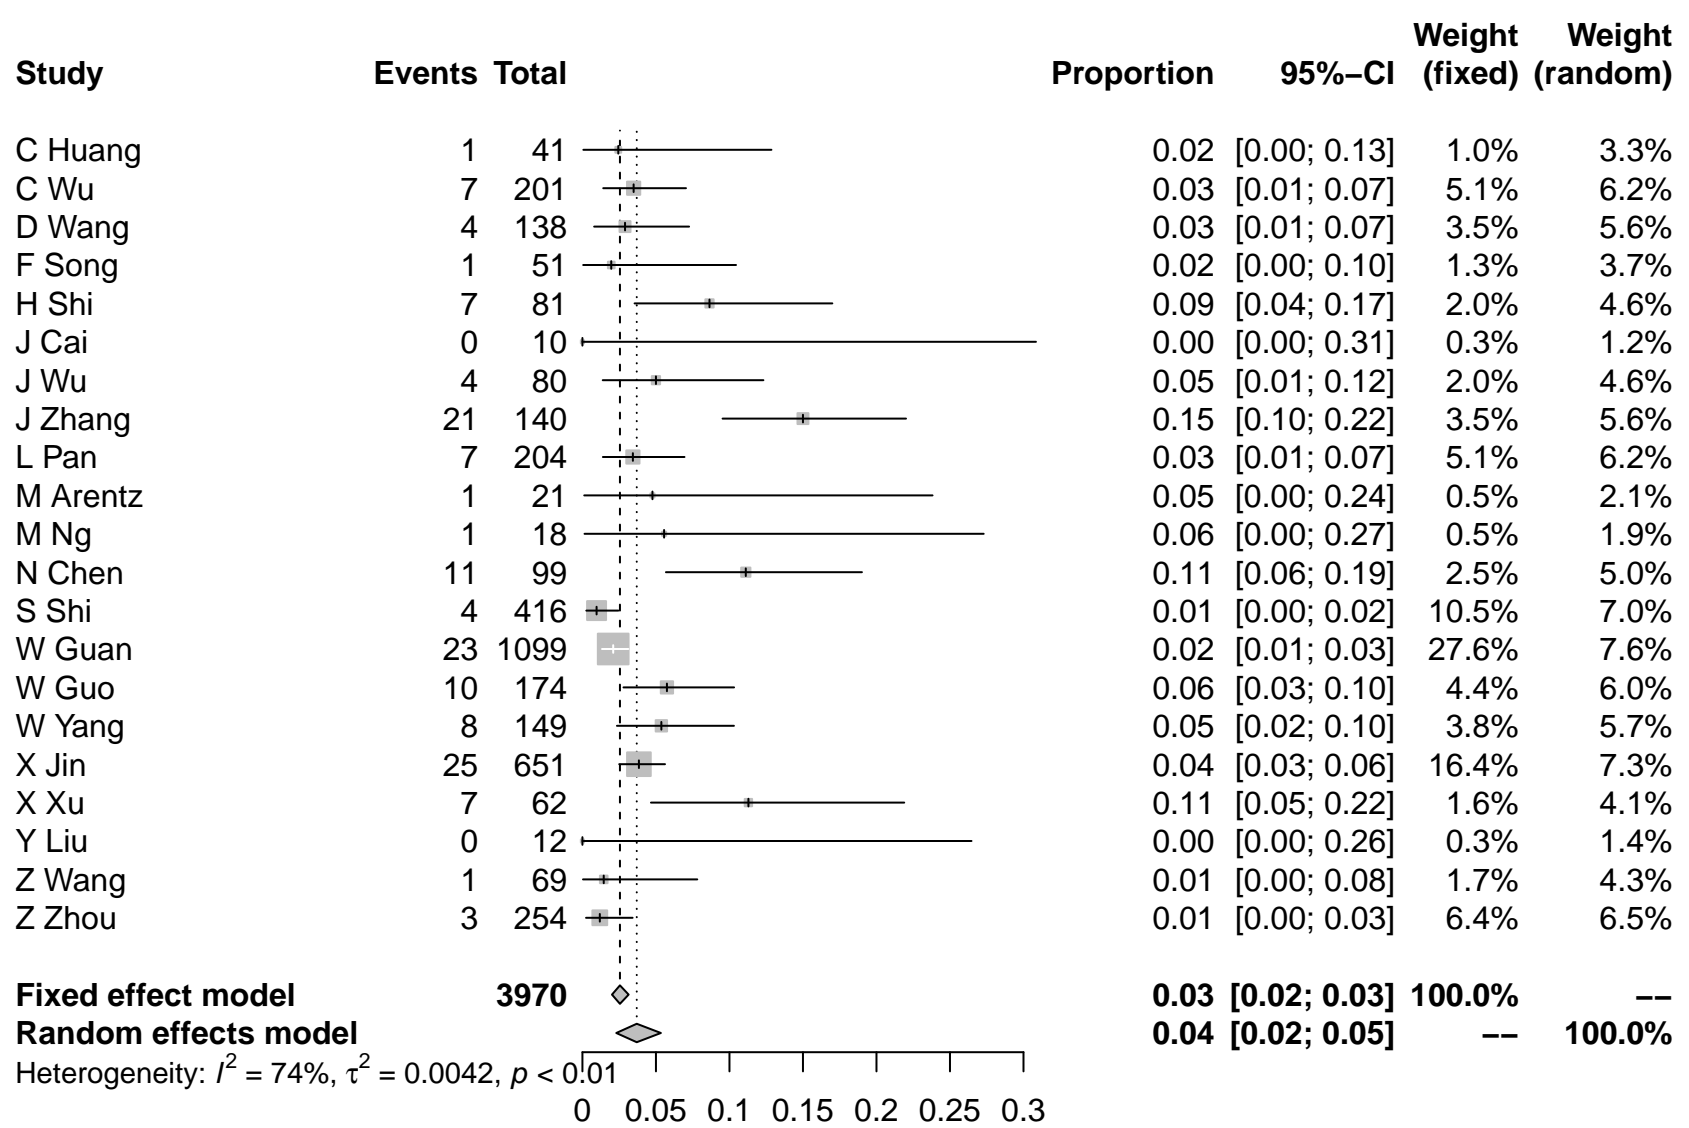

**Supplementary Figure 2.** The pooled estimate of GI symptoms as initial presenting symptoms in patients with COVID-19.

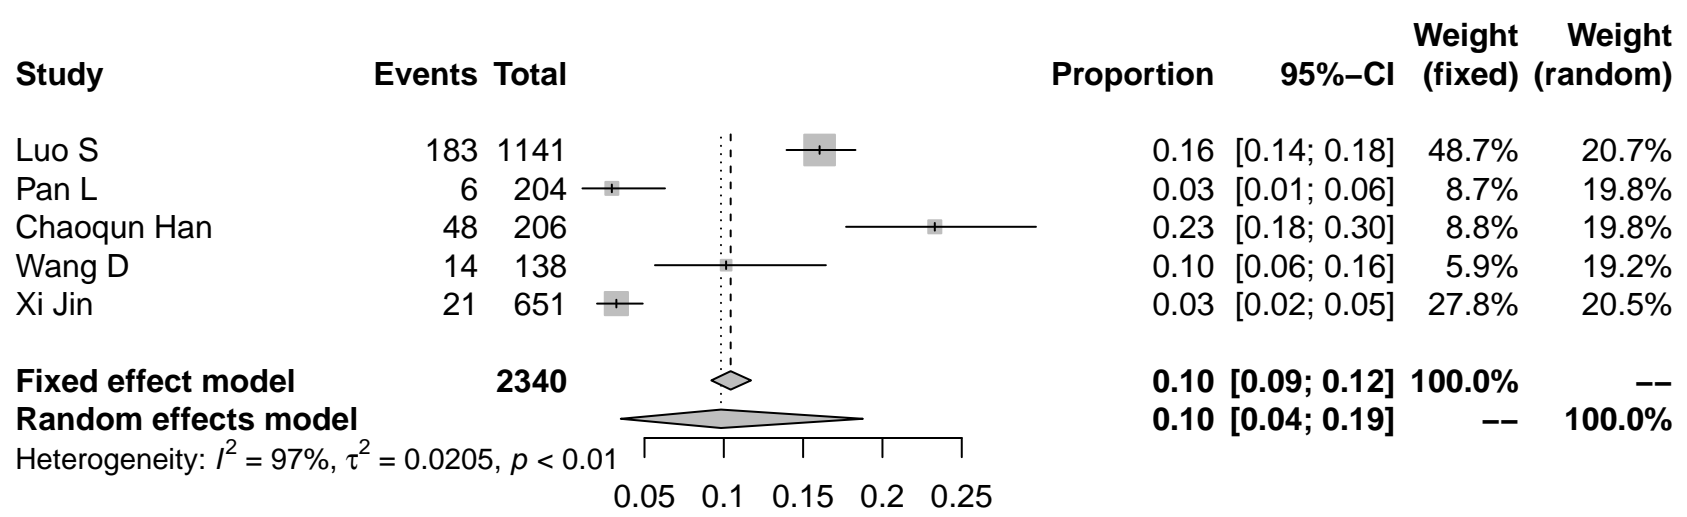

**Supplementary Figure 3.** Pooled estimate of GI symptoms rate in patients with COVID-19.

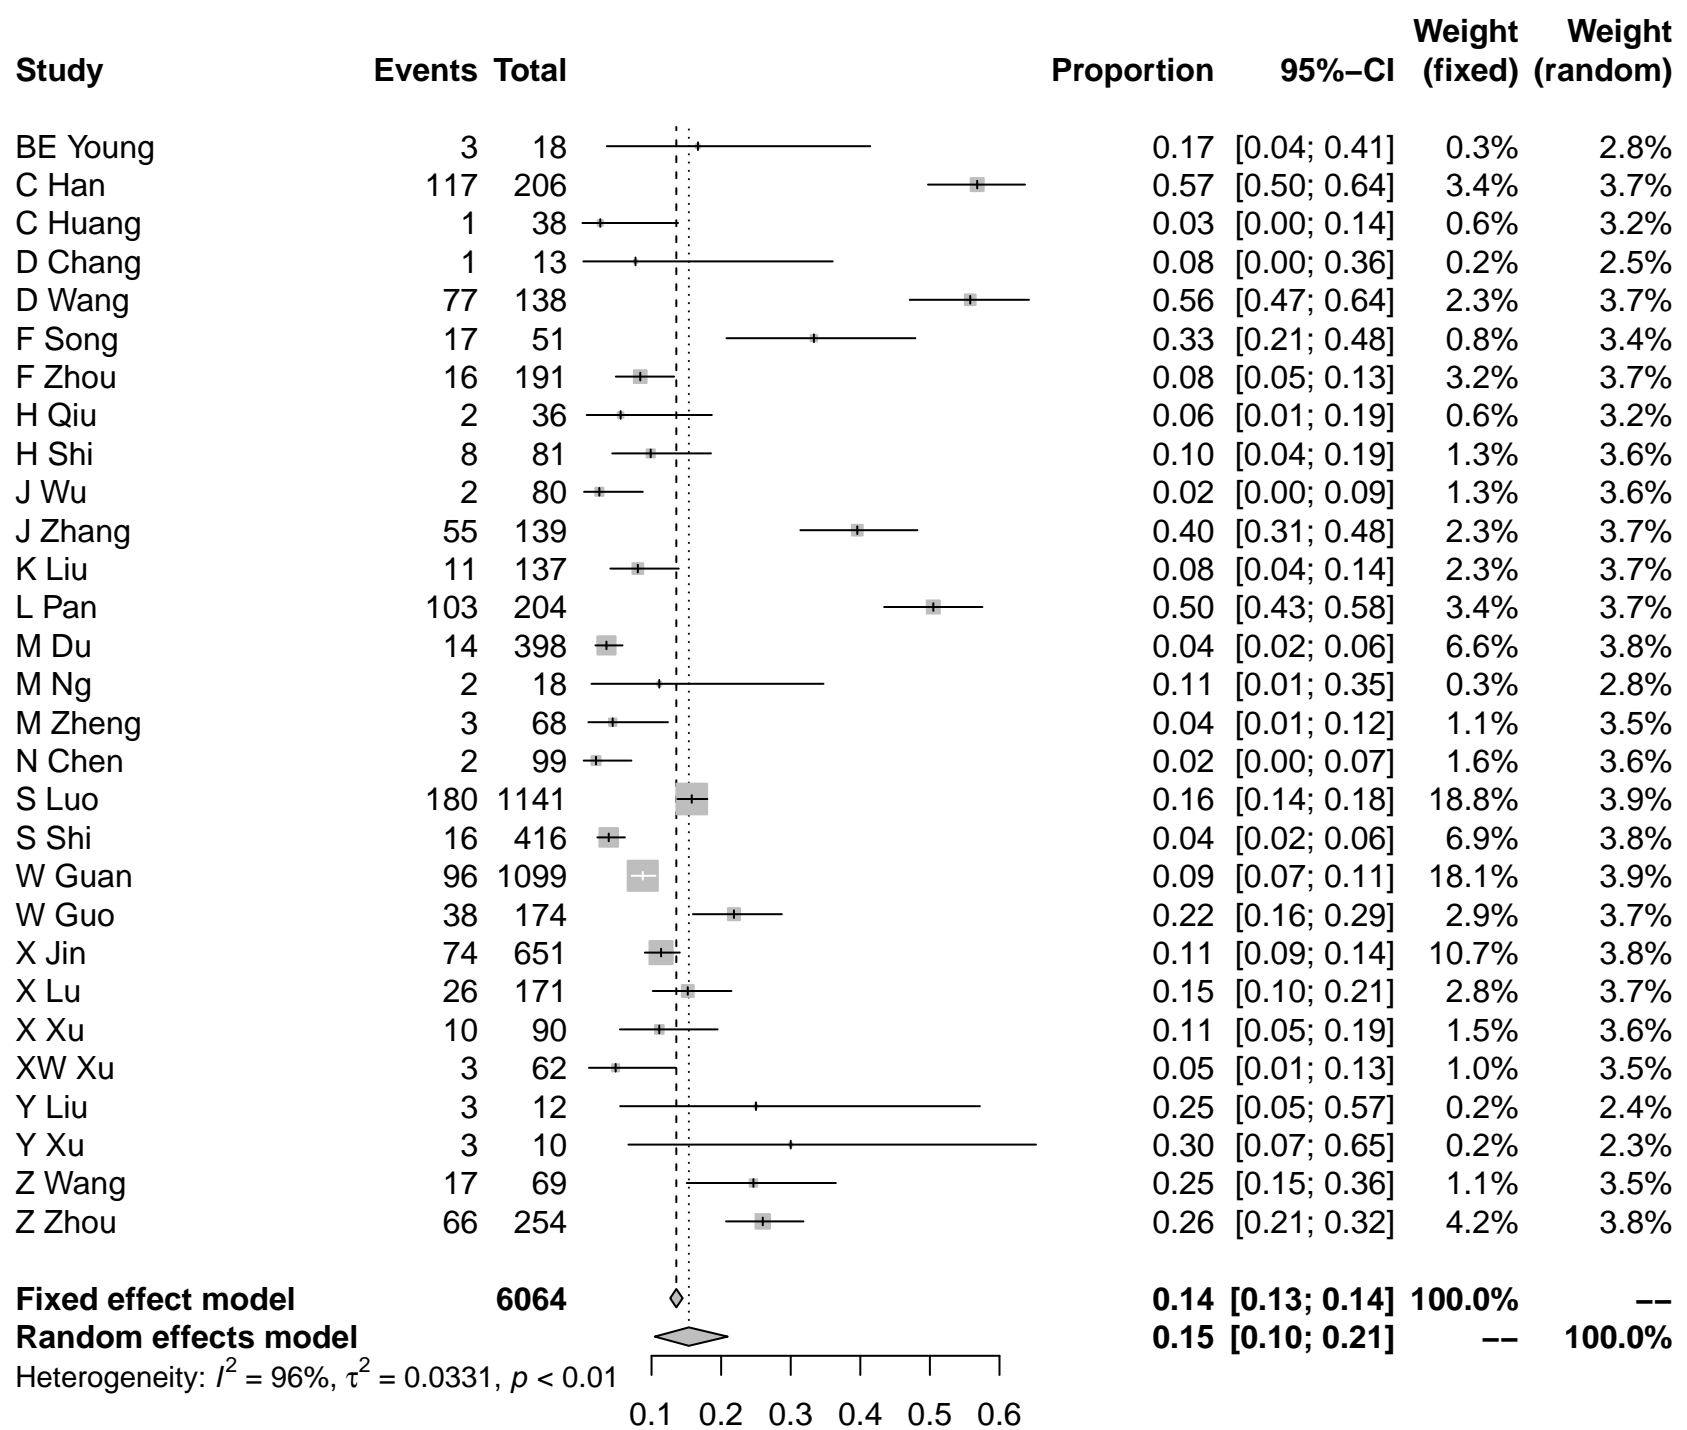



**Supplementary Figure 4.** Estimated incidence of liver injury in patients with COVID-19.

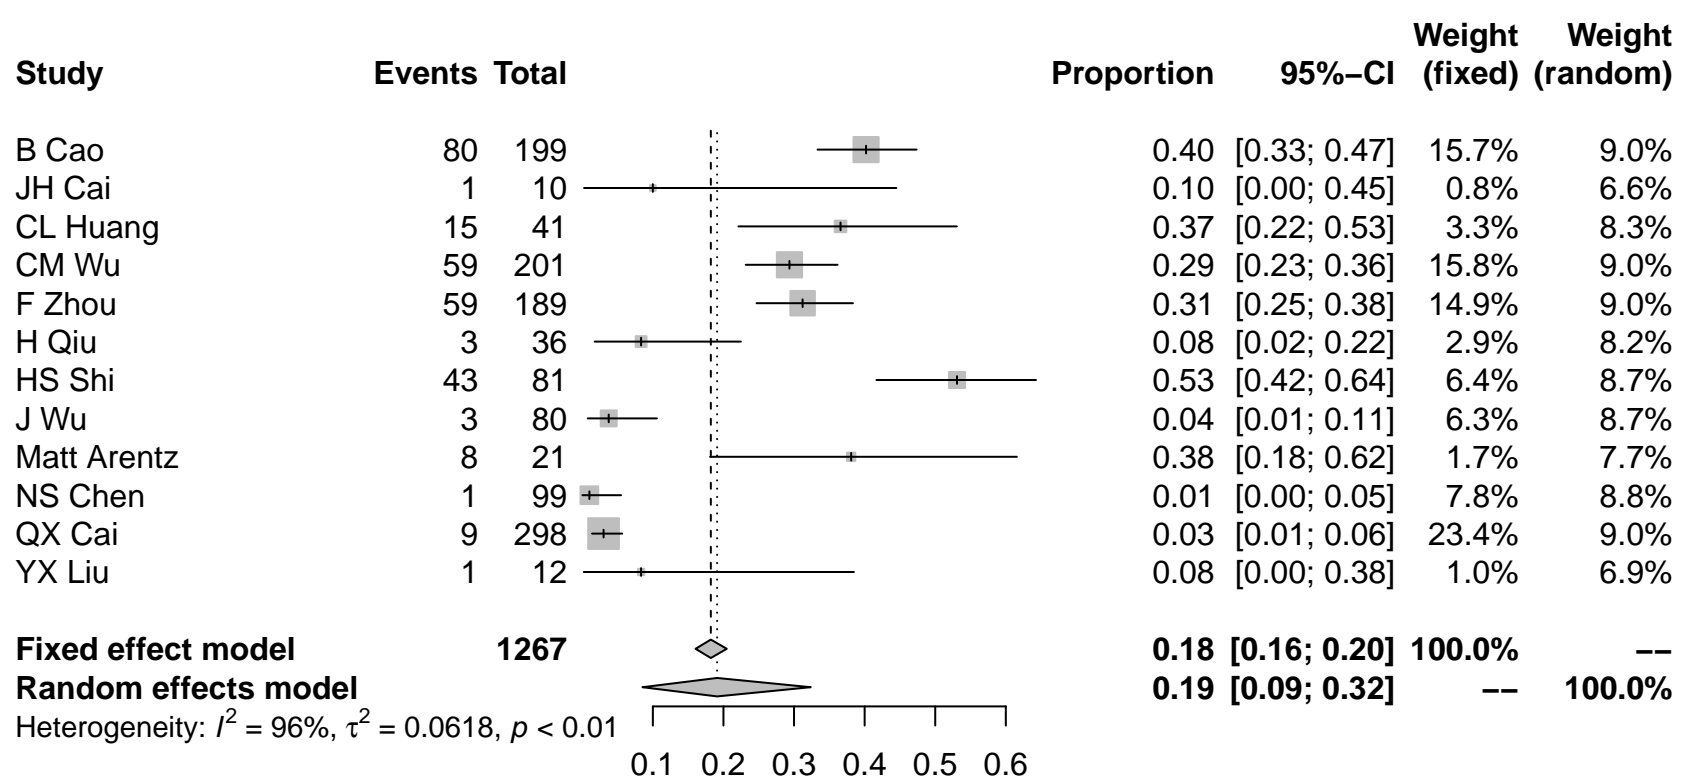

**Supplementary Figure 5.** Estimated incidence of severe case stratified by digestive/liver-related comorbidities

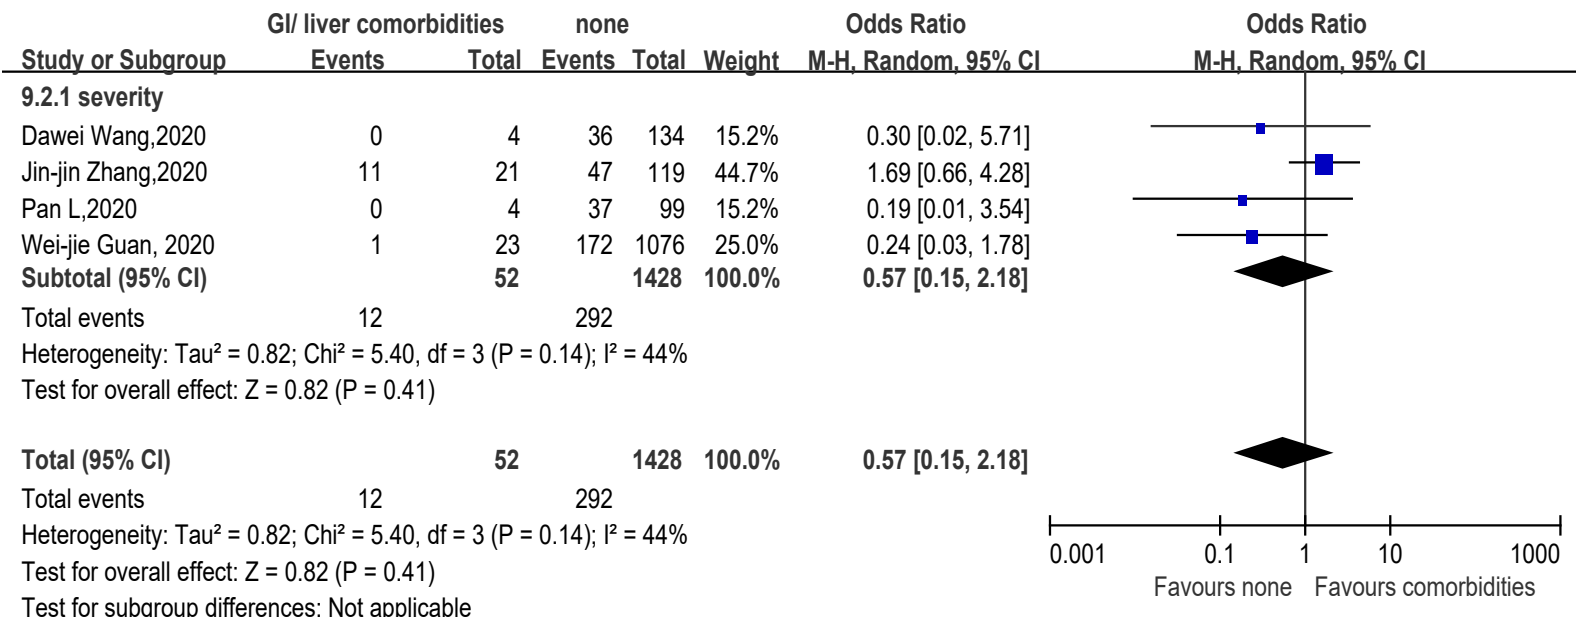

**Supplementary Figure 6.** The pooled estimate of complications in patients with COVID-19 stratified by GI system involvement

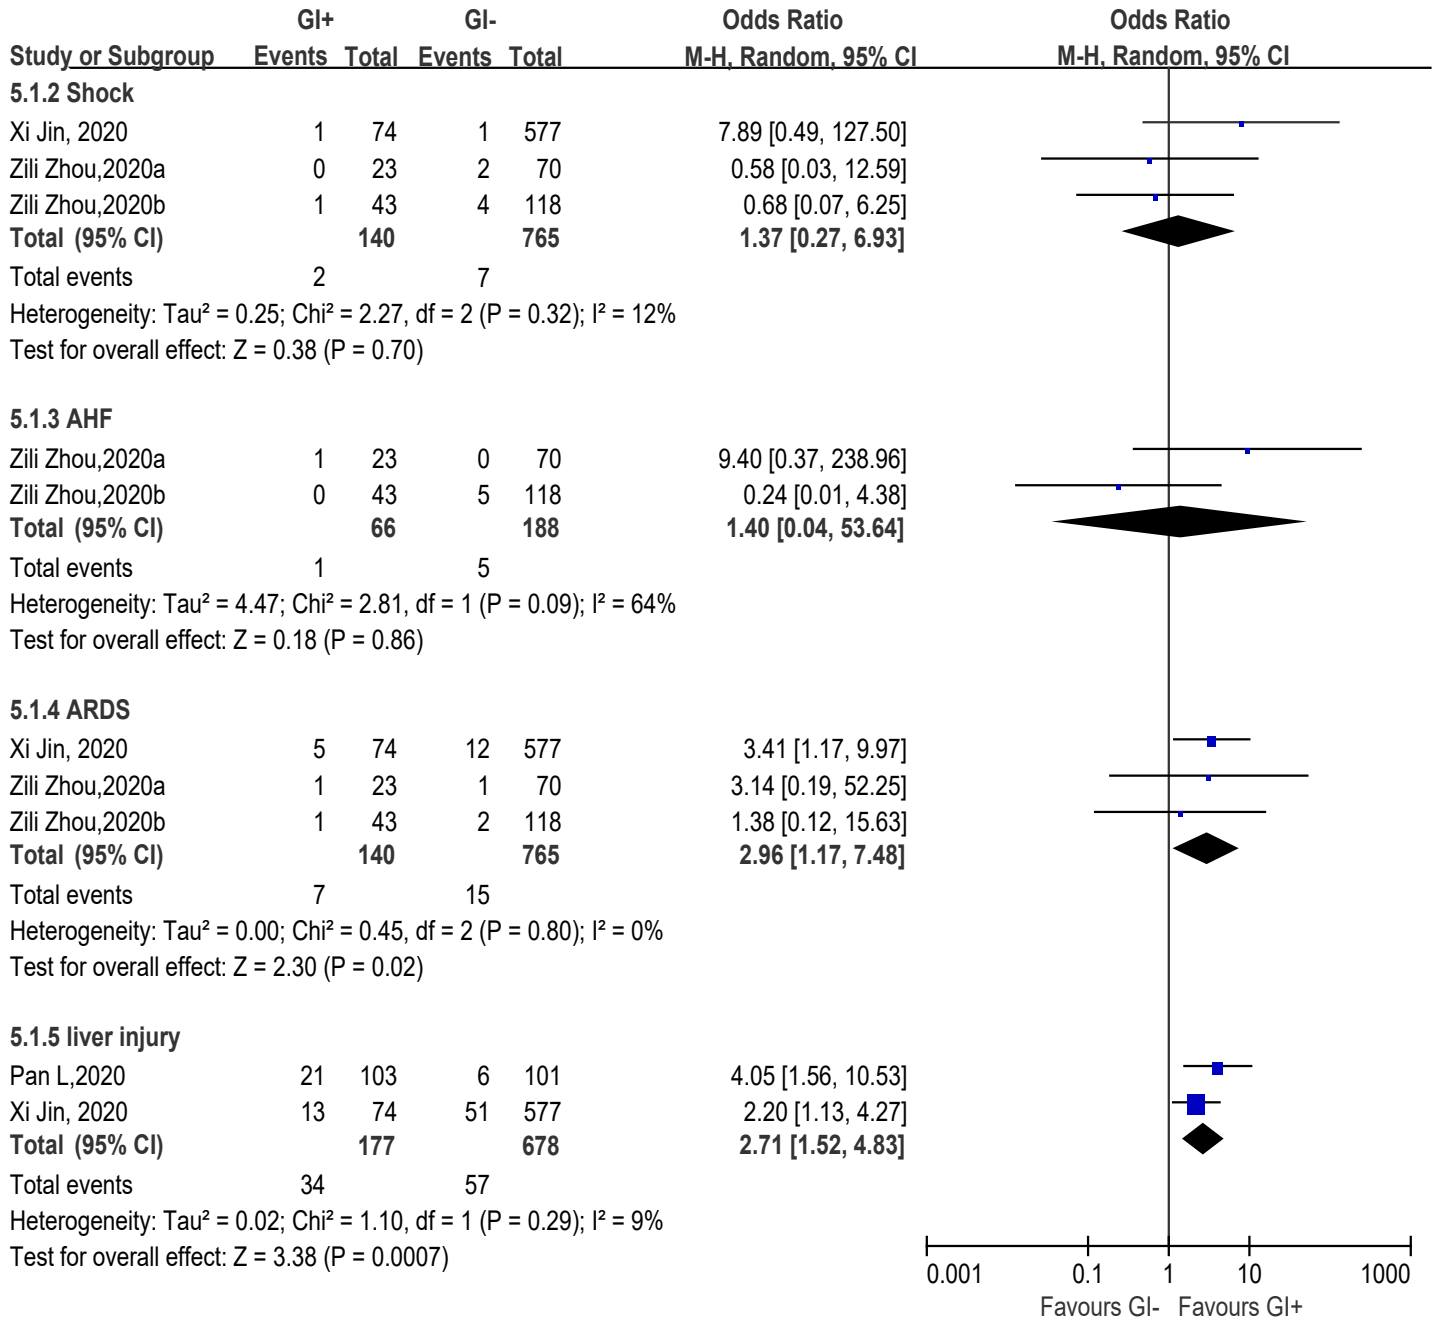

**Supplementary Figure 7.** Forrest plot of meta-analysis of standardized mean differences (SMD) of liver chemistry according to patients' disease severity (severe vs. non-severe).

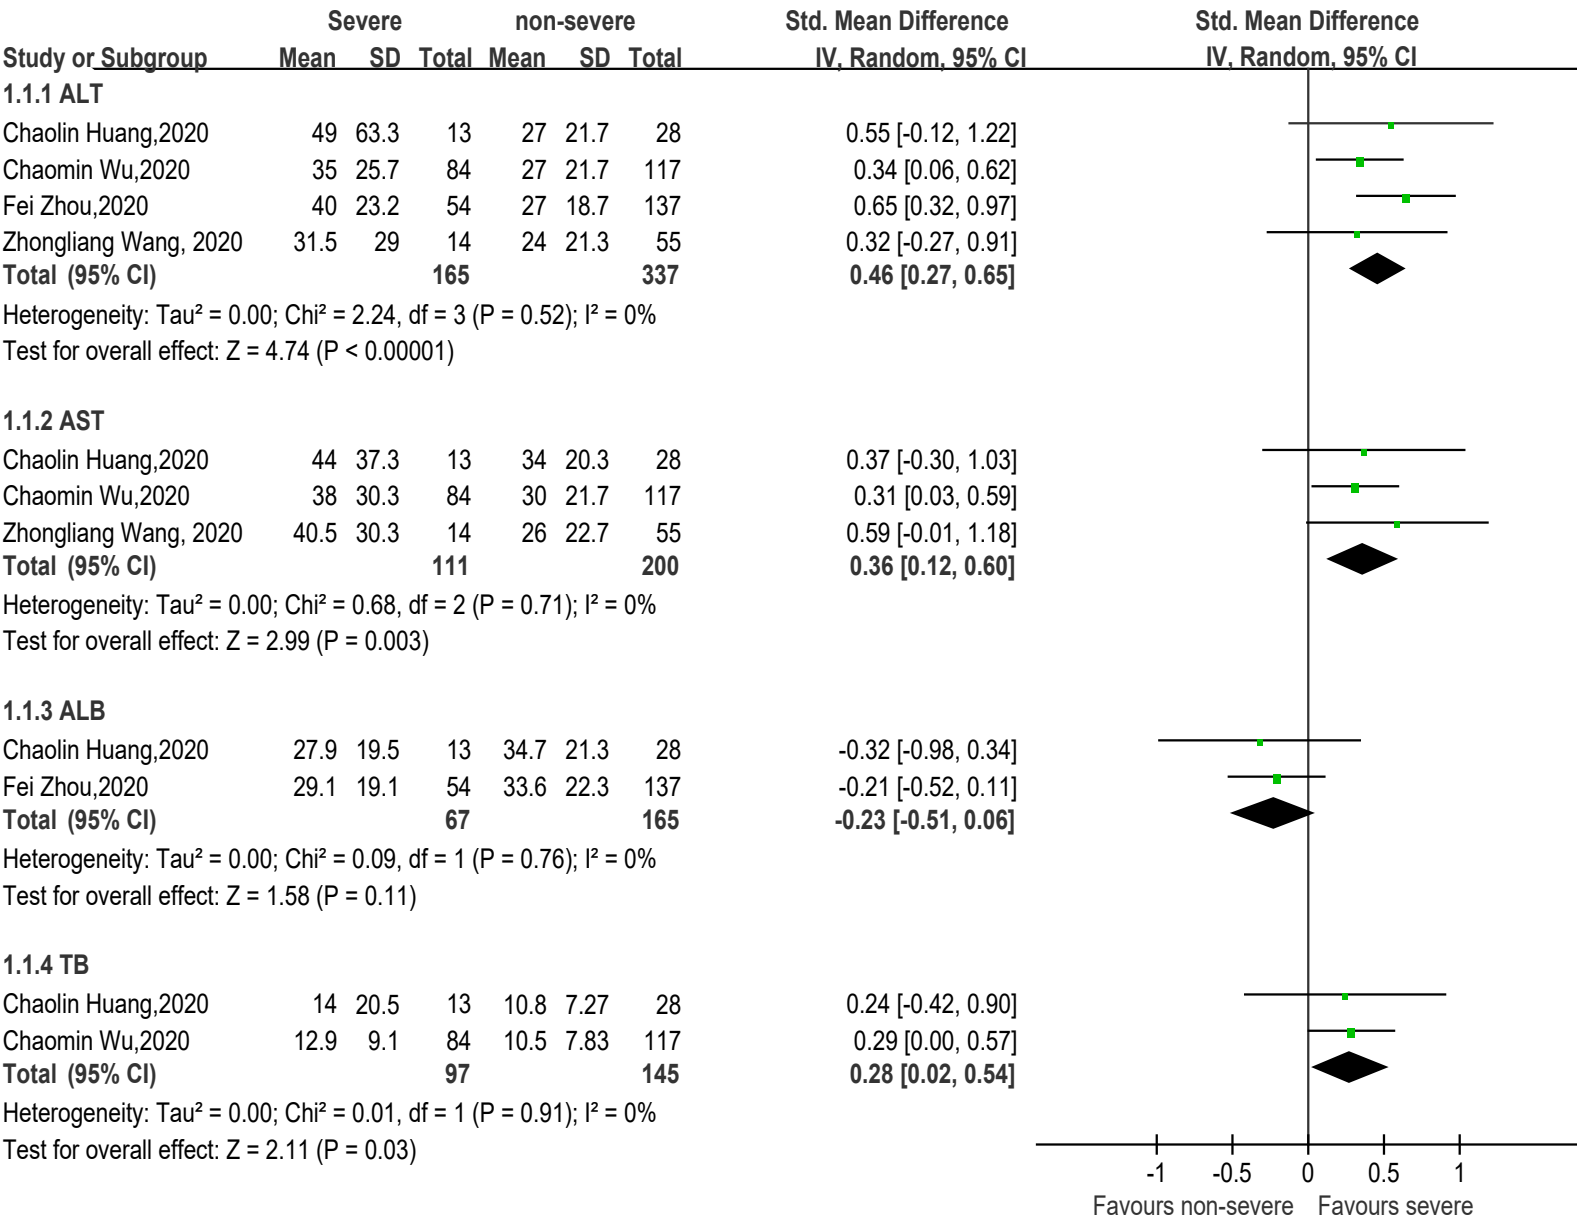

**Supplementary Figure 8.** Begg's funnel plot for publication bias for incidence of digestive symptoms. Studies (circles) within the projected 95% CI (diagonal lines) should have complementary areas on the opposite side of the dashed line (estimated risk ratio). Gaps in the funnel patterns indicate possible areas of publication bias.

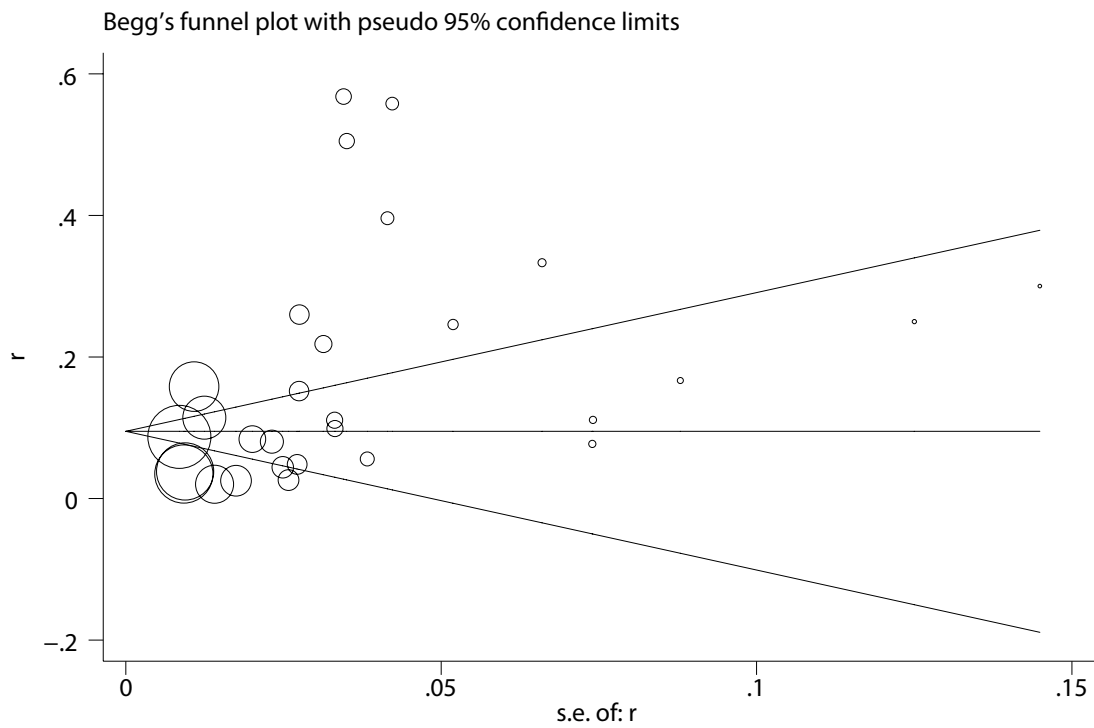

Supplement: mmc1.pdf [file mmc1.pdf]
